# Supplementary material
Source: MDPI journal article supplement (https://www.mdpi.com/1424-2818/14/3/214)
Supplement: s1 [file s1]

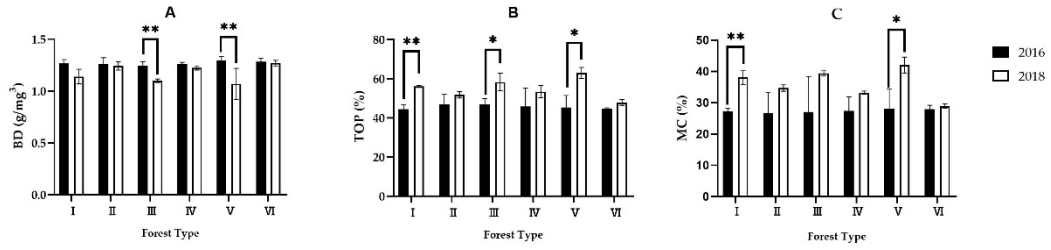

**Figure S1.** Comparison of the physical properties of surface soil (0–20 cm) at the beginning of afforestation (2016) and after two years of afforestation (2018)

Notes: a: Comparison of bulk density values of surface soil (0-20 cm) before and after afforestation; b: Comparison of total porosity of surface soil (0-20 cm) before and after afforestation; c: Comparison of water content of surface soil (0-20 cm) before and after afforestation. I: *P. yunnanensis* × *A. nepalensis* (2:1); II: *P. yunnanensis* × *A. nepalensis* (3:1); III: *P. yunnanensis* × *Q. acutissima* (2:1); IV: *P. yunnanensis* × *Q. acutissima* (3:1); V: *P. yunnanensis* × *C. tetrandra* (2:1); VI: *P. yunnanensis* pure forest. \*\*means the significant correlation at P<0.01, \* means the significant correlation at P<0.05.

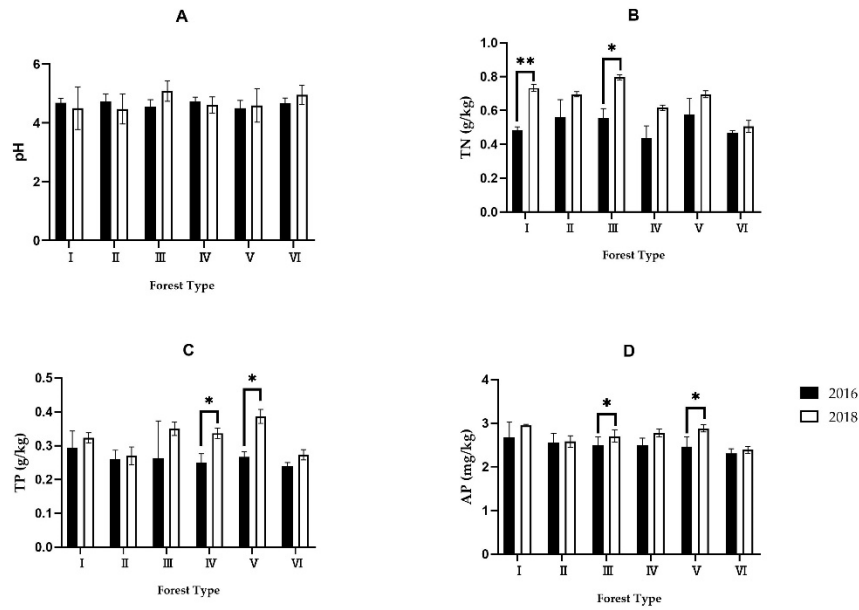

**Figure S2.** Comparison of the chemical properties of topsoil (0–20 cm) in different forest types at the beginning of afforestation (2016) and after two years of afforestation (2018)

Notes: a: comparison of soil pH of topsoil (0-20cm) in different forest types before and after afforestation; b: comparison of soil total nitrogen of topsoil (0-20cm) in different forest types before and after afforestation; c: comparison of soil total phosphorus of topsoil (0-20cm) in different forest types before and after afforestation; d: comparison of soil available phosphorus of topsoil (0-20cm) in different forest types before and after afforestation. I: *P. yunnanensis* × *A. nepalensis* (2:1); II: *P. yunnanensis* × *A. nepalensis* (3:1); III: *P. yunnanensis* × *Q. acutissima* (2:1); IV: *P. yunnanensis* × *Q. acutissima* (3:1); V: *P. yunnanensis* × *C. tetrandra* (2:1); VI: *P. yunnanensis* pure forest. \*\*means the significant correlation at  $P<0.01$ , \* means the significant correlation at  $P<0.05$ .

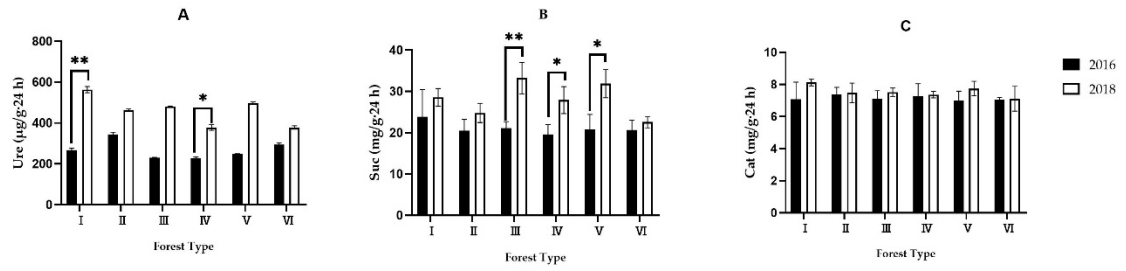

**Figure S3.** Comparison of the enzyme activities in the surface soil (0–20 cm) of different forest types at the beginning of afforestation (2016) and after two years of afforestation (2018).

Notes: a: comparison of urease activity in surface soil (0–20cm) of different forest types before and after afforestation; b: comparison of sucrase activity in surface soil (0–20cm) of different forest types before and after afforestation; c: comparison of enzyme activities in surface soil (0–20cm) of different forest types before and after afforestation. I: *P. yunnanensis*  $\times$  *A. nepalensis* (2:1); II: *P. yunnanensis*  $\times$  *A. nepalensis* (3:1); III: *P. yunnanensis*  $\times$  *Q. acutissima* (2:1); IV: *P. yunnanensis*  $\times$  *Q. acutissima* (3:1); V: *P. yunnanensis*  $\times$  *C. tetrandra* (2:1); VI: *P. yunnanensis* pure forest. \*\*means the significant correlation at  $P<0.01$ , \* means the significant correlation at  $P<0.05$ .
